# Supplementary material for: Characterization of a P1-like bacteriophage carrying CTX-M-27 in Salmonella spp. resistant to third generation cephalosporins isolated from pork in China
Source: PubMed Central journal article supplement (PMC5241659; doi:10.1038/srep40710), 2017-01-18
Supplement: srep40710-s1.pdf [file srep40710-s1.pdf]

## Supplementary Data

### **Characterization of a P1-like bacteriophage carrying CTX-M-27 in *Salmonella spp.* resistant to third generation cephalosporins isolated from pork in China**

Ling Yang<sup>1,2†</sup>, Wan Li<sup>1†</sup>, Gui-Ze Jiang<sup>1</sup>, Wen-Hui Zhang<sup>1</sup>, Huan-Zhong Ding<sup>2</sup>, Ya-Hong Liu<sup>1</sup>,

Zhen-Ling Zeng<sup>2\*</sup> and Hong-Xia Jiang<sup>1\*</sup>

College of Veterinary Medicine, <sup>1</sup>National Risk Assessment laboratory for antimicrobial resistance of animal original bacteria, <sup>2</sup>Guangdong Provincial Key Laboratory of Veterinary Pharmaceutics Development and Safety Evaluation, South China Agricultural University (SCAU), Guangzhou 510642, China;

<sup>†</sup> Equal contribution

\*Corresponding author

Email: [hxjiang@scau.edu.cn](mailto:hxjiang@scau.edu.cn);

Tel: +86 20 85283934

Fax: +86 20 85284896

Email: [zlzeng@scau.edu.cn](mailto:zlzeng@scau.edu.cn)

Tel: +86 20 85281204

Fax: +86 20 85284899

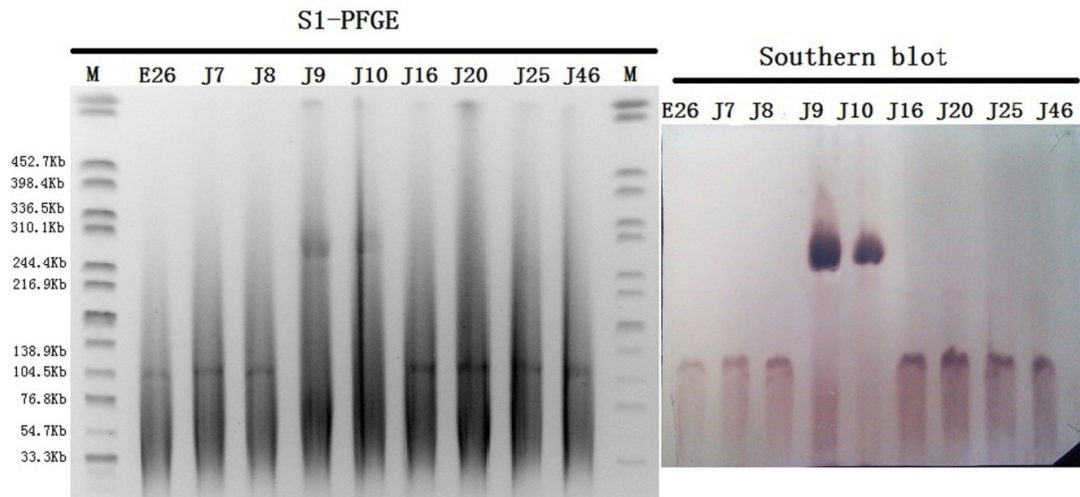

Figure S1. Results of S1-PFGE and southern blot assay for nine *bla*<sub>CTX-M-27</sub>-containing transformants

Table S1. Features of predicted ORFs in SJ46

| ORF | ORF position | Coding strand | Length (aa) | Best GenBank match , aa, Accession No.                                           | E value, aa identity  | conserved domains                     | Putative functional assignment, relevant reference(s)                                                                                                                                          |
|-----|--------------|---------------|-------------|----------------------------------------------------------------------------------|-----------------------|---------------------------------------|------------------------------------------------------------------------------------------------------------------------------------------------------------------------------------------------|
| 1   | 245..529     | -             | 94          | Uhr [Enterobacteria phage P1], 94aa, YP_006535.1                                 | 6e-65, 94/94(100%)    | -                                     | Unknown protein function                                                                                                                                                                       |
| 2   | 804..983     | +             | 59          | UpfC [Enterobacteria phage P1], 59aa, YP_006534.1                                | 2e-34, 59/59(100%)    | -                                     | Unknown protein function                                                                                                                                                                       |
| 3   | 992..1780    | +             | 262         | UpfB [Escherichia coli 2362-75] , 262aa, EFR18857.1                              | 0.0, 262/262(100%)    | -                                     | Unknown protein function                                                                                                                                                                       |
| 4   | 1820..2242   | +             | 140         | PpfA [Enterobacteria phage P1, 140aa, YP_006532.1                                | 1e-97, 139/140(99%)   | -                                     | Possible periplasmic function                                                                                                                                                                  |
| 5   | 2277..2408   | +             | 43          | membrane lipoprotein precursor Mlp [Escherichia phage RCS47], 43aa, CDN90812.1   | 2e-23, 43/43(100%)    | -                                     | Membrane lipoprotein precursor (by homology)                                                                                                                                                   |
| 6   | 2420..2812   | +             | 130         | UpfA [Enterobacteria phage P1], 130aa, YP_006530.1                               | 3e-89, 128/130(98%)   | -                                     | Unknown protein function                                                                                                                                                                       |
| 7   | 3133..4031   | +             | 294         | replication protein RepA [Escherichia phage RCS47], 294aa, CDN90810.1            | 0.0, 294/294(100%)    | -                                     | Plasmid replication initiated by chaperone-activated monomers at oriR; represses own synthesis; binds at iterated sites (incC and incA) and can handcuff them, controlling plasmid copy number |
| 8   | 4324..5007   | +             | 227         | hypothetical protein EC54115_07577 [Escherichia coli 541-15] , 269aa, EIL56554.1 | 2e-170, 227/227(100%) | T5orf172; GIY-YIG_SF superfamily      | Unknown protein function                                                                                                                                                                       |
| 9   | 5302..6498   | +             | 398         | partition protein ParA [Escherichia phage RCS47], 398aa, CDN90808.1              | 0.0, 398/398(100%)    | BcsQ; ParA; P-loop_NTPase superfamily | Plasmid partitioning; weak ATPase, binds to parO repressing transcription, binds to ParB-parS                                                                                                  |

|           |              |   |     |                                                                                            |                       |                                           | partition complex                                                                                                                                                                      |
|-----------|--------------|---|-----|--------------------------------------------------------------------------------------------|-----------------------|-------------------------------------------|----------------------------------------------------------------------------------------------------------------------------------------------------------------------------------------|
| <b>10</b> | 6515..7516   | + | 333 | ParB [Enterobacteria phage P1], 333aa, YP_006527.1                                         | 0.0, 332/333(99%)     | ParB superfamily; ParBc; Spo0J; parB_part | Plasmid partitioning; binds to parS, enhances ParA-mediated repression of par operon and ATPase of ParA; can spread over DNA flanking parS, silencing gene expression; pairs parS loci |
| <b>11</b> | 7742..9448   | + | 568 | Gp23 [Enterobacteria phage P1], 568aa, YP_006526.1                                         | 0.0, 567/568(99%)     | -                                         | Major head protein, present in P1 heads in full-length (62 kDa) and truncated (44 kDa) forms                                                                                           |
| <b>12</b> | 9509..11098  | + | 529 | hypothetical protein AF33_04663, Gp22 [Escherichia coli CHS 77]; 529aa, KDG50404.1         | 0.0, 526/529(99%)     | -                                         | Sheath protein                                                                                                                                                                         |
| <b>13</b> | 11108..11923 | + | 271 | tail tube protein Gp21 [Escherichia phage RCS47], 271aa, CDN90804.1                        | 6e-175, 262/271(97%)  | -                                         | Baseplate or tail tube                                                                                                                                                                 |
| <b>14</b> | 11959..12540 | + | 193 | PmgG [Enterobacteria phage P1], 193aa, YP_006523.1                                         | 3e-136, 191/193(99%)  | -                                         | Putative morphogenetic function                                                                                                                                                        |
| <b>15</b> | 12552..13061 | + | 169 | BpIB [Enterobacteria phage P1], 169aa, YP_006522.1                                         | 1e-122, 168/169(99%)  | -                                         | Putative baseplate structural protein                                                                                                                                                  |
| <b>16</b> | 13197..13829 | + | 210 | hypothetical protein Y979_25865 (plasmid) [Escherichia coli str. Sanji], 210aa, AMU85563.1 | 1e-151, 210/210(100%) | -                                         | Unknown protein function                                                                                                                                                               |
| <b>17</b> | 14009..14260 | - | 83  | membrane protein [Escherichia coli], 81aa, AHM43618.1                                      | 6e-46, 73/81(90%)     | -                                         | Membrane protein                                                                                                                                                                       |
| <b>18</b> | 14320..14835 | - | 171 | attachment protein [Escherichia coli], 171aa, AHM43619.1                                   | 1e-122, 171/171(100%) | ompX; Ail_Lom; OM_channels superfamily    | Unknown protein function                                                                                                                                                               |
| <b>19</b> | 14931..15773 | - | 280 | RepL [Enterobacteria phage P7], 281aa,                                                     | 0.0,                  | -                                         | Lytic replication, initiates replication                                                                                                                                               |

|           |              |   |      |                                                                                  |                       |                                                                                                                                                                                |                                                                   |
|-----------|--------------|---|------|----------------------------------------------------------------------------------|-----------------------|--------------------------------------------------------------------------------------------------------------------------------------------------------------------------------|-------------------------------------------------------------------|
|           |              |   |      | CDN90799.1                                                                       | 261/281(93%)          |                                                                                                                                                                                | at oriL (within repL)                                             |
| <b>20</b> | 15803..16603 | - | 266  | KilA [ Enterobacteria phage P7], 266aa, AAQ07519.1                               | 0.0, 266/266(100%)    | -                                                                                                                                                                              | Unknown,expression can kill host                                  |
| <b>21</b> | 16768..17814 | - | 348  | Antirepressor protein, Ant1[ Enterobacteria phage P7], 348aa, AAQ07516.1         | 0.0, 344/348(99%)     | -                                                                                                                                                                              | Antagonism of C1 repression; forms complex with Ant2              |
| <b>22</b> | 18643..19164 | + | 173  | Upf 50.5 [Enterobacteria phage P7], 173aa, AAQ07514.1                            | 1e-118, 173/173(100%) | Radical SAM superfamily                                                                                                                                                        | Outer membrane lipoprotein of unknown function                    |
| <b>23</b> | 19168..19707 | + | 179  | Upf 50.0 [Enterobacteria phage P7], 179aa, AAQ07513.1                            | 2e-118, 179/179(100%) | phosphodiesterase; Provisional ( PRK12704); Protein of unknown function (DUF3584)                                                                                              | Conserved membrane protein of unknown function                    |
| <b>24</b> | 19836..20354 | + | 172  | PmgC [Escherichia phage RCS47], 188aa, CDN90792.1                                | 5e-118, 169/172(98%)  | -                                                                                                                                                                              | Putative morphogenetic protein                                    |
| <b>25</b> | 20365..20976 | + | 203  | phage major tail tube protein, TubB [Escherichia coli UMNF18], 203aa, AEJ60191.1 | 8e-146, 201/203(99%)  | -                                                                                                                                                                              | Phage major tail tube protein                                     |
| <b>26</b> | 20991..21827 | + | 293  | PmgB [Escherichia coli UMNF18], 293aa, AEJ60190.1                                | 0.0, 292/293(99%)     | -                                                                                                                                                                              | Phage morphogenetic protein                                       |
| <b>27</b> | 21954..25367 | + | 1137 | Sit [Enterobacteria phage P1], 1140aa, YP_006507.1                               | 0.0, 993/1140(87%)    | Lytic Transglycosylase (LT) and Goose Egg White Lysozyme (GEWL) domain; Transglycosylase SLT domain; Secretion system effector C (SseC) like family; internal virion protein D | Structural injection transglycosylase; putative tail tube “ruler” |

|           |              |   |     |                                                                                                                                             |                          |                                                                             |                                             |
|-----------|--------------|---|-----|---------------------------------------------------------------------------------------------------------------------------------------------|--------------------------|-----------------------------------------------------------------------------|---------------------------------------------|
| <b>28</b> | 25367..25763 | + | 118 | PmgA [Enterobacteria phage P1], 118aa,<br>YP_006506.1                                                                                       | 2e-81,<br>118/118(100%)  | -                                                                           | Putative morphogenetic protein              |
| <b>29</b> | 25720..27153 | + | 477 | Bp1A [Enterobacteria phage P1], 477aa,<br>YP_006505.1                                                                                       | 0.0,<br>477/477(100%)    | -                                                                           | Putative baseplate structural protein       |
| <b>30</b> | 27153..27989 | + | 278 | Gp16 [Escherichia coli 2362-75], 278aa,<br>EFR18935.1                                                                                       | 0.0,<br>278/278(100%)    |                                                                             | Putative tail tube protein                  |
| <b>31</b> | 28068..28502 | + | 144 | GpR [Enterobacteria phage P7], 144aa,<br>AAQ07505.1                                                                                         | 2e-101,<br>144/144(100%) | -                                                                           | Structure or assembly of tail fibers        |
| <b>32</b> | 28514..30856 | + | 780 | major tail fiber protein, partial<br>[Salmonella enterica subsp. enterica<br>serovar Newport str. JS09102], 457aa,<br>EMG75401.1            | 0.0,<br>457/457(100%)    | Phage tail fibre repeat;<br>Phage-related tail fibre<br>protein             | Tail fiber protein                          |
| <b>33</b> | 30858..31625 | + | 135 | Fels-2 prophage Tfa [Salmonella enterica<br>subsp. enterica serovar Rissen str. 150],<br>135aa, ELX20892.1                                  | 9e-96,<br>135/135(100%)  | Caudo-TAP super family                                                      | Caudovirales tail fibre assembly<br>protein |
| <b>34</b> | 31269..31856 | - | 195 | phage tail-fiber assembly protein<br>[Salmonella enterica subsp. enterica<br>serovar Agona str. SH08SF124], 195aa,<br>ELP15074.1            | 7e-143,<br>195/195(100%) | Caudo-TAP super family                                                      | Phage tail-fiber assembly protein           |
| <b>35</b> | 31856..33181 | - | 441 | phage tail protein [Salmonella enterica<br>subsp. enterica serovar Infantis], 554aa,<br>KNK93741.1                                          | 0.0,<br>417/440(95%)     | Phage-related tail fibre<br>protein (COG5301)                               | Phage tail protein                          |
| <b>36</b> | 33176..33757 | + | 193 | site-specific recombinase, DNA invertase<br>Pin [Salmonella enterica subsp. enterica<br>serovar Newport str. JS09102], 193aa,<br>EMG75300.1 | 7e-140,<br>193/193(100%) | Serine Recombinase (SR)<br>family; ; mpi; PinE;<br>HTH_Hin_like superfamily | Site-specific recombinase                   |

|    |              |   |     |                                                                                                                       |                          |                                                                                                          |                                                                                                                                               |
|----|--------------|---|-----|-----------------------------------------------------------------------------------------------------------------------|--------------------------|----------------------------------------------------------------------------------------------------------|-----------------------------------------------------------------------------------------------------------------------------------------------|
| 37 | 33889..34113 | - | 74  | DNA-invertase [Salmonella enterica subsp. enterica serovar Newport str. JS09102], 74aa, EMG75301.1                    | 1e-47,<br>74/74(100%)    | Serine Recombinase (SR) family; Resolvase; N terminal domain; PinE; mpi                                  | DNA-invertase                                                                                                                                 |
| 38 | 34178..34522 | + | 114 | hypothetical protein G209_23302 [Salmonella enterica subsp. enterica serovar Newport str. JS09102], 114aa, EMG75302.1 | 6e-79,<br>114/114(100%)  | -                                                                                                        | Unknown protein function                                                                                                                      |
| 39 | 34590..34919 | + | 109 | LydA [Enterobacteria phage P1], 109aa, YP_006497.1                                                                    | 9e-71,<br>109/109(100%)  | -                                                                                                        | Lysis determinant; putative holin (by homology)                                                                                               |
| 40 | 34916..35359 | + | 147 | LydB [Enterobacteria phage P7], 147aa, AAQ07501.1                                                                     | 2e-106,<br>147/147(100%) | -                                                                                                        | Lysis determinant; prevents premature lysis, LydA antagonist                                                                                  |
| 41 | 35346..35948 | + | 200 | conserved protein of unknown function Hdf [Escherichia phage RCS47], 200aa, CDN90775.1                                | 1e-137,<br>198/200(99%)  | -                                                                                                        | Uncertain; homolog to DarA fragment; defect possibly causes <i>gta</i> (generalized transduction affected) phenotype                          |
| 42 | 35950..37869 | + | 639 | DarA [Escherichia phage RCS47], 639aa, CDN90774.1                                                                     | 0.0,<br>633/639(99%)     | Prefoldin subunit; SH3 domain protein; PRK09039; Chromosome segregation ATPase; Spc7 kinetochore protein | Defends against restriction by type I Res endonuclease and enables DarB to function; internal head protein processed by Pro                   |
| 43 | 37866..38231 | + | 121 | DdrA [Salmonella enterica subsp. enterica serovar Derby], 121aa, KNQ83755.1                                           | 2e-80,<br>120/121(99%)   | -                                                                                                        | Uncertain; product of gene downstream of <i>darA</i> ; defect possibly alters P1B:P1S:P1M ratios; <i>vad</i> (viral architecture determinant) |
| 44 | 38271..39479 | - | 402 | transposase [Escherichia coli], 402aa, WP_024183914.1                                                                 | 0.0,<br>389/402(97%)     | HTH_OrfB_IS605;InsQ; OrfB_IS605 superfamily; OrfB_Zn_ribbon                                              | Transposase                                                                                                                                   |
| 45 | 39579..42566 | + | 995 | DdrB [Escherichia coli], 995aa,                                                                                       | 0.0,                     | -                                                                                                        | Unknown; product of the second                                                                                                                |

|           |              |   |      |                                                                                                                            |                       |                                                                          |                                                                                                                            |
|-----------|--------------|---|------|----------------------------------------------------------------------------------------------------------------------------|-----------------------|--------------------------------------------------------------------------|----------------------------------------------------------------------------------------------------------------------------|
|           |              |   |      | KYV78578.1                                                                                                                 | 995/995(100%)         |                                                                          | gene downstream of darA; possible protease or response regulator                                                           |
| <b>46</b> | 42556..42867 | + | 311  | putative repressor protein Hxr [Escherichia phage RCS47], 311aa, CDN90770.1                                                | 5e-67, 103/103(100%)  | -                                                                        | Function proposed based on presence of conserved amino acid motif, structural f                                            |
| <b>47</b> | 42897..43679 | - | 260  | conserved protein of unknown function, IsaA [Escherichia phage RCS47], 260aa, CDN90768.1                                   | 0.0, 259/260(99%)     | -                                                                        | Homolog of xre; possible repressor protein                                                                                 |
| <b>48</b> | 43686..44531 | - | 281  | PF11195 family protein [Escherichia coli JB1-95], 281aa, EIH87607.1                                                        | 0.0, 280/281(99%)     | -                                                                        | Protein of unknown function                                                                                                |
| <b>49</b> | 44561..45049 | - | 162  | Single-stranded DNA-binding protein, Ssb [Enterobacteria phage P1], 162aa, YP_006485.1                                     | 2e-116, 162/162(100%) | SSB; RPA_2b-aaRSs_OBF_like superfamily; PHA01740 superfamily             | Single-stranded DNA binding protein; can suppress E. coli ssb                                                              |
| <b>50</b> | 45132..45776 | + | 214  | phage lysozyme, Lyz[Escherichia coli 907713], 214aa, ESA89767.1                                                            | 3e-159, 214/214(100%) | lysozyme_like superfamily                                                | Lysozyme                                                                                                                   |
| <b>51</b> | 45769..46020 | + | 83   | LydD, putative holin [Enterobacteria phage P1], 84aa, YP_006483.1                                                          | 2e-50, 81/83(98%)     | -                                                                        | Lysis determinant D, putative holin                                                                                        |
| <b>52</b> | 46068..47087 | - | 339  | putative head processing protein, Pro[Salmonella enterica subsp. enterica serovar Newport str. JS09102], 339aa, EMG75315.1 | 0.0, 339/339(100%)    | NTP-PPase superfamily                                                    | Putative head processing protease and kinase; required for head morphogenesis and maturation of DarA precursor protein     |
| <b>53</b> | 47080..48789 | - | 569  | putative portal protein, Prt[Salmonella enterica subsp. enterica serovar Newport str. JS09102], 569aa, EMG75316.1          | 0.0, 569/569(100%)    | -                                                                        | Portal protein (by similarity)                                                                                             |
| <b>54</b> | 48880..53361 | + | 1493 | helicase, DarB[Salmonella enterica subsp. enterica serovar Derby], 2255aa, KNQ83765.1                                      | 0.0, 1486/1493(99%)   | DEXDc; ResIII; dnd_restrict_1; Methyltransf_26; HsdM; N-6_Mtase; SNF2_N; | Defense (in cis) against a subset of type I Res enzymes, e.g. EcoB, EcoK; putative DNA methyltransferase and DNA helicase; |



|           |              |   |     |                                                                                                             |                       |                                                            |                                                                  |
|-----------|--------------|---|-----|-------------------------------------------------------------------------------------------------------------|-----------------------|------------------------------------------------------------|------------------------------------------------------------------|
|           |              |   |     |                                                                                                             |                       | HepA                                                       | may methylate DNA during injection                               |
| <b>55</b> | 53542..55632 | + | 696 | helicase conserved C-terminal domain protein [Escherichia coli DEC6A], 2218aa, EHV49330.1                   | 0.0, 689/696(99%)     | heterocyst_DevB                                            | Defense against restriction protein                              |
| <b>56</b> | 55666..56106 | + | 146 | putative protein Ulx [Escherichia phage RCS47], 146aa, KGM68784.1                                           | 1e-101, 146/146(100%) | -                                                          | Unknown protein function                                         |
| <b>57</b> | 56103..56351 | + | 82  | Lxc [Enterobacteria phage P7], 82aa, AAQ07487.1                                                             | 9e-55, 82/82(100%)    | -                                                          | Modulator of C1 action                                           |
| <b>58</b> | 56389..57510 | - | 373 | GTP pyrophosphokinase [Salmonella enterica subsp. enterica serovar Newport str. JS09102], 373aa, EMG75319.1 | 0.0, 373/373(100%)    | NT_Rel-Spo_like; RelA_SpoT; YjbM; Glyco_hydro_15           | Lowers expression of c1, enhances binding of C1 to its operators |
| <b>59</b> | 57623..58264 | - | 213 | Maturation control protein, Mat[Escherichia phage RCS47], 213aa, CDN90745.1                                 | 3e-154, 209/213(98%)  | -                                                          | Particle maturation                                              |
| <b>60</b> | 58513..61479 | - | 988 | transposase for transposon Tn1721 [Klebsiella pneumoniae subsp. pneumoniae HS11286], 988aa, YP_005220836.1  | 0.0, 988/988(100%)    | DDE_Tnp_Tn3; COG4644; DUF4158                              | Transposase for transposon                                       |
| <b>61</b> | 61483..61857 | - | 124 | DNA resolvase, tnpR [Escherichia coli], 153aa, WP_061089326.1                                               | 8e-83, 124/124(100%)  | SR_ResInv; HTH_Hin_like; Resolvase; HTH_7; PinE; mpi       | DNA resolvase                                                    |
| <b>62</b> | 61861..62199 | + | 112 | hypothetical protein [Escherichia coli IS5], 112aa, CDK50280.1                                              | 9e-75, 112/112(100%)  | -                                                          | Unknown protein function                                         |
| <b>63</b> | 62353..62982 | + | 209 | methyl-accepting chemotaxis protein [Escherichia coli], 209aa, WP_013188478.1                               | 2e-153, 208/209(99%)  | PAS; PAS_3; PRK13558                                       | Methyl-accepting chemotaxis protein                              |
| <b>64</b> | 62957..63982 | - | 341 | iron outer membrane receptor, IronN (plasmid) [Escherichia coli] 341aa, AKI06962.1                          | 0.0, 341/341(100%)    | ligand_gated_channel; TonB_dep_Rec; CirA; TonB-siderophor; |                                                                  |

|           |              |   |     |                                                                                                                        |                      |                                                                | PRK09840                                               |
|-----------|--------------|---|-----|------------------------------------------------------------------------------------------------------------------------|----------------------|----------------------------------------------------------------|--------------------------------------------------------|
| <b>65</b> | 64111..65079 | - | 322 | transposase InsC for insertion sequence IS903 [Klebsiella pneumoniae subsp. pneumoniae HS11286], 322aa, YP_005224844.1 | 0.0, 322/322(100%)   | DDE_Tnp_1_5; DDE_Tnp_1                                         | Transposase                                            |
| <b>66</b> | 65114..65989 | - | 291 | class A extended-spectrum beta-lactamase CTX-M-27 [Escherichia coli], 291aa, WP_032277257.1                            | 0.0, 291/291(100%)   | Beta-lactamase2; Transpeptidase superfamily;                   | Extended-spectrum beta-lactamase                       |
| <b>67</b> | 66239..66496 | - | 85  | ISEcp1B transposase, partial [Proteus mirabilis], 347aa, AGE10672.1                                                    | 5e-53, 85/85(100%)   | DDE_Tnp_1_4                                                    | Transposase                                            |
| <b>68</b> | 66576..66923 | + | 115 | Methyl-accepting chemotaxis protein (MCP) signaling domain [Escherichia coli], 115aa, CTV83025.1                       | 4e-75, 115/115(100%) | MCP_signal                                                     | Methyl-accepting chemotaxis protein                    |
| <b>69</b> | 67071..67652 | - | 193 | Ref [Enterobacteria phage P7], 216aa, AAQ07480.1                                                                       | 7e-124, 174/187(93%) | -                                                              | Recombination enhancement function                     |
| <b>70</b> | 67900..68211 | - | 103 | lysogeny establishment protein, C8 [Salmonella enterica subsp. enterica serovar Infantis], 103aa, KNN15215.1           | 8e-68, 103/103(100%) | -                                                              | Establishment of lysogeny?                             |
| <b>71</b> | 68262..69293 | - | 343 | Cre [Enterobacteria phage P1], 343aa, YP_006472.1                                                                      | 0.0, 342/343(99%)    | INT_Cre_C; Phage_integrase; Phage_int_SAM_4; recomb_XerC; XerD | Cyclization recombinase                                |
| <b>72</b> | 69301..69522 | - | 73  | Cra [Enterobacteria phage P1], 73aa, YP_006471.1                                                                       | 6e-47, 72/73(99%)    | -                                                              | Putative cre associated function                       |
| <b>73</b> | 70127..70336 | + | 69  | Coi, C1 repressor inactivator [Enterobacteria phage P1], 69aa, YP_006578.1                                             | 4e-43, 69/69(100%)   | -                                                              | C1 (reversible) inactivator; forms 1:1 complex with C1 |
| <b>74</b> | 70447..71298 | + | 283 | phage repressor protein , C1[Enterobacteria phage phiW39], 283aa,                                                      | 0.0, 283/283(100%)   | -                                                              | Primary repressor of lytic function                    |

## AAV84927.1

|           |              |   |     |                                                                                                         |                         |                                |                                                                                                                           |
|-----------|--------------|---|-----|---------------------------------------------------------------------------------------------------------|-------------------------|--------------------------------|---------------------------------------------------------------------------------------------------------------------------|
| <b>75</b> | 71323..72807 | - | 494 | terminase B protein PacB [Escherichia phage RCS47], 494aa, CDN90859.1                                   | 0.0,<br>492/494(99%)    | -                              | DNA packaging; cuts at pac together with PacA                                                                             |
| <b>76</b> | 72807..74000 | - | 397 | Terminase A protein PacA [Escherichia phage RCS47], 397aa, CDN90858.1                                   | 0.0,<br>392/397(99%)    | -                              | DNA packaging; cuts at pac together with PacB                                                                             |
| <b>77</b> | 74087..74509 | - | 140 | late promoter-activating protein (Gp10) [Escherichia coli M605], 150aa, EGI13364.1                      | 2e-98,<br>140/140(100%) | -                              | Late promoter activator                                                                                                   |
| <b>78</b> | 74628..75671 | - | 347 | PdcB [Enterobacteria phage P1], 347aa, YP_006573.1                                                      | 0.0,<br>343/347(99%)    | DUF968 superfamily             | Unknown; post-doc                                                                                                         |
| <b>79</b> | 75699..75878 | - | 59  | PdcA [Escherichia coli ISC7], 59aa, CDL28025.1                                                          | 2e-33,<br>59/59(100%)   | -                              | Unknown; post-doc                                                                                                         |
| <b>80</b> | 75883..76263 | - | 126 | Doc [Enterobacteria phage P1], 126aa, YP_006571.1                                                       | 1e-85,<br>126/126(100%) | DOC_P1; Doc; Fic               | Death on curing; toxin of P1 addiction system; reversible inhibitor of protein synthesis; corepressor of addiction operon |
| <b>81</b> | 76263..76484 | - | 73  | Phd [Enterobacteria phage P1]; 73aa, YP_006570.1                                                        | 9e-45,<br>73/73(100%)   | PhdYeFM_antitox; Phd; phd_fam  | antitoxin of P1 addiction system; Prevent host death protein                                                              |
| <b>82</b> | 76557..76946 | - | 129 | DNA repair protein HumD [Enterobacteria phage P1], 129aa, YP_006569.1                                   | 1e-89,<br>128/129(99%)  | S24_LexA-like; PRK10276; LexA; | Homolog of UmuD' subunit of E. coli repair protein DNA polymerase V (UmuD'-UmuC); complements mutant UmuD'                |
| <b>83</b> | 77121..77705 | + | 194 | Upf94.2 [Enterobacteria phage P7], 194aa, AAQ07574.1                                                    | 2e-142,<br>192/194(99%) | -                              | Unknown protein function                                                                                                  |
| <b>84</b> | 77706..78062 | + | 118 | hypothetical protein AEW06_01065 [Salmonella enterica subsp. enterica serovar Derby], 118aa, KNQ83785.1 | 4e-81,<br>118/118(100%) | -                              | Unknown protein function                                                                                                  |
| <b>85</b> | 78925..79062 | + | 45  | hypothetical protein EC40522_B0049                                                                      | 8e-22,<br>-             | -                              | Unknown protein function                                                                                                  |

|           |              |   |     |                                                                                                                                      |                         |                    |                                 |
|-----------|--------------|---|-----|--------------------------------------------------------------------------------------------------------------------------------------|-------------------------|--------------------|---------------------------------|
|           |              |   |     | [Escherichia coli 4.0522], 45aa,<br>EIH76026.1                                                                                       | 45/45(100%)             |                    |                                 |
| <b>86</b> | 79138..79500 | - | 120 | PmgV [Enterobacteria phage P1], 120aa,<br>EMG75338.1                                                                                 | 8e-76,<br>116/120(97%)  | -                  | Putative morphogenetic function |
| <b>87</b> | 79497..80429 | - | 310 | hypothetical protein G209_23492<br>[Salmonella enterica subsp. enterica<br>serovar Newport str. JS09102], 310aa,<br>EMG75338.1       | 0.0,<br>310/310(100%)   | -                  | Unknown protein function        |
| <b>88</b> | 80411..80785 | - | 124 | hypothetical protein G209_23497<br>[Salmonella enterica subsp. enterica<br>serovar Newport str. JS09102], 124aa,<br>EMG75339.1       | 2e-87,<br>124/124(100%) | -                  | Unknown protein function        |
| <b>89</b> | 80792..81052 | - | 86  | hypothetical protein G209_23502<br>[Salmonella enterica subsp. enterica<br>serovar Newport str. JS09102], 86aa,<br>EMG75340.1        | 9e-58,<br>86/86(100%)   | -                  | Unknown protein function        |
| <b>90</b> | 81093..81215 | - | 40  | hypothetical protein SEEPO729_20495<br>[Salmonella enterica subsp. enterica<br>serovar Pomona str. ATCC 10729] , 40aa,<br>EHN41314.1 | 1e-19,<br>40/40(100%)   | -                  | Unknown protein function        |
| <b>91</b> | 81264..81497 | - | 77  | hypothetical protein G209_23507<br>[Salmonella enterica subsp. enterica<br>serovar Newport str. JS09102], 77aa,<br>EMG75341.1        | 3e-48,<br>77/77(100%)   | -                  | Unknown protein function        |
| <b>92</b> | 81574..81834 | - | 86  | hypothetical protein G209_23512<br>[Salmonella enterica subsp. enterica<br>serovar Newport str. JS09102], 85aa,<br>EMG75342.1        | 3e-55,<br>85/85(100%)   | -                  | Unknown protein function        |
| <b>93</b> | 81831..82691 | - | 286 | Eaa protein [Salmonella enterica subsp.                                                                                              | 0.0,                    | DUF551 superfamily | Phage protein,                  |

|            |              |   |     |                                                                                                                                                                       |                          |                                                    |                                                                         |
|------------|--------------|---|-----|-----------------------------------------------------------------------------------------------------------------------------------------------------------------------|--------------------------|----------------------------------------------------|-------------------------------------------------------------------------|
|            |              |   |     | enterica serovar Newport str. JS09102],<br>286aa, EMG75343.1                                                                                                          | 286/286(100%)            |                                                    |                                                                         |
| <b>94</b>  | 82693..83373 | - | 226 | ead/Ea22-like family protein [Escherichia coli 2-474-04_S1_C1], 226aa, KDY77502.1                                                                                     | 1e-164,<br>223/226(99%)  | Ead_Ea22 superfamily                               | Unknown protein function                                                |
| <b>95</b>  | 83370..84014 | - | 214 | hypothetical protein G209_23006 [Salmonella enterica subsp. enterica serovar Newport str. JS09102], 214aa, EMG75346.1 2-Upf87.6 [Enterobacteria phage P7], AAQ07562.1 | 9e-162,<br>214/214(100%) | -                                                  | Unknown protein function; encodes putative tyrosine protein phosphatase |
| <b>96</b>  | 84007..84267 | - | 86  | Upf87.4 [Enterobacteria phage P7], 86aa, AAQ07561.1                                                                                                                   | 6e-58,<br>86/86(100%)    | -                                                  | Unknown protein function                                                |
| <b>97</b>  | 84260..84841 | - | 193 | Upf86.8 [Enterobacteria phage P7], 193aa, AAQ07560.1                                                                                                                  | 6e-141,<br>192/193(99%)  | ASCH_yqfb_like                                     | Unknown protein function                                                |
| <b>98</b>  | 84851..84985 | - | 44  | putative membrane protein [Escherichia coli 2362-75], 44aa, EFR18883.1                                                                                                | 2e-23,<br>44/44(100%)    | -                                                  | Putative membrane protein                                               |
| <b>99</b>  | 85036..85542 | - | 168 | putative morphogenetic protein [Salmonella enterica subsp. enterica serovar Newport str. JS09102],                                                                    | 2e-122,<br>168/168(100%) | -                                                  | Putative membrane protein                                               |
| <b>100</b> | 85615..86877 | - | 420 | putative morphogenetic protein , PmgS[Salmonella enterica subsp. enterica serovar Newport str. JS09102], 168aa, EMG75351.1                                            | 0.0,<br>420/420(100%)    | Phage_GP20;<br>SMC_prok_B; PRK02224;<br>SCP-1; Smc | Putative morphogenetic protein                                          |
| <b>101</b> | 87179..87880 | - | 233 | putative morphogenic function protein PmgQ [Escherichia phage RCS47], 233aa, CDN90836.1                                                                               | 1e-171,<br>232/233(99%)  | -                                                  | Head morphogenesis                                                      |
| <b>102</b> | 87877..88569 | - | 230 | Ppp [Enterobacteria phage P7], 230aa,                                                                                                                                 | 8e-172,                  | MPP_PrpA_PrpB; pphA;                               | Protein phosphatase                                                     |

|            |              |   |     |                                                                                                                             |                          |                          |                                                           |
|------------|--------------|---|-----|-----------------------------------------------------------------------------------------------------------------------------|--------------------------|--------------------------|-----------------------------------------------------------|
|            |              |   |     | AAQ07555.1                                                                                                                  | 229/230(99%)             | Metallophos; apaH; PP2Ac |                                                           |
| <b>103</b> | 88551..89087 | - | 178 | PmgP [Escherichia coli O10:K5(L):H4 str. ATCC 23506], 208aa, CCP95118.1                                                     | 3e-129,<br>176/178(99%)  | -                        | Putative morphogenetic protein                            |
| <b>104</b> | 89075..89575 | - | 166 | putative morphogenic function protein<br>PmgO [Escherichia phage RCS47], 220aa, CDN90833.1                                  | 9e-119,<br>165/166(99%)  | -                        | Prophage functions                                        |
| <b>105</b> | 89679..89834 | - | 51  | PmgN [Enterobacteria phage P1], 51aa, YP_006553.1                                                                           | 6e-29,<br>51/51(100%)    | -                        | Putative morphogenetic protein                            |
| <b>106</b> | 89901..90479 | - | 192 | pmgM [Escherichia coli 5905], 192aa, EKH93593.1                                                                             | 2e-139,<br>189/192(98%)  | VRR_NUC superfamily      | Norphogenetic protein                                     |
| <b>107</b> | 90482..90727 | - | 81  | PmgL [Enterobacteria phage P1], 81aa, YP_006551.1                                                                           | 3e-53,<br>80/81(99%)     | DiS_P_DiS superfamily    | putative morphogenetic function                           |
| <b>108</b> | 90874..91251 | + | 125 | gp26 [Enterobacteria phage P1], 125aa, YP_006550.1                                                                          | 6e-88,<br>125/125(100%)  | -                        | Putative baseplate protein                                |
| <b>109</b> | 91261..92478 | + | 405 | gp25 [Enterobacteria phage P1], 405aa, YP_006549.1                                                                          | 0.0,<br>403/405(99%)     | PTZ00121                 | Phage tail protein                                        |
| <b>110</b> | 92482..93210 | + | 242 | gp7 [Enterobacteria phage P1], 242aa, YP_006548.1                                                                           | 3e-178,<br>242/242(100%) | -                        | Phage tail protein                                        |
| <b>111</b> | 93197..93982 | + | 261 | gp24 [Enterobacteria phage P1], 261, YP_006547.1                                                                            | 0.0,<br>260/261(99%)     | -                        | Baseplate                                                 |
| <b>112</b> | 93984..95000 | + | 338 | Upf77.7 [Escherichia coli STEC_C165-02], 338aa, EGW72531.1                                                                  | 0.0,<br>338/338(100%)    | -                        | Phage tail length tape measure protein [Escherichia coli] |
| <b>113</b> | 94993..95625 | + | 210 | Upf76.8 [Enterobacteria phage P7], 210aa, AAQ07544.1                                                                        | 4e-149,<br>209/210(99%)  | -                        | Phage-related baseplate assembly protein                  |
| <b>114</b> | 95672..96670 | - | 332 | hypothetical protein SEEPO729_20365 [Salmonella enterica subsp. enterica serovar Pomona str. ATCC 10729], 332aa, EHN41288.1 | 0.0,<br>332/332(100%)    | -                        | Unknown protein function                                  |
| <b>115</b> | 96670..98034 | - | 454 | Ban [Enterobacteria phage P1], 454aa,                                                                                       | 0.0,                     | DnaB_C; P-loop_NTPase    | Replicative DNA helicase                                  |

|            |                |   |     |                                                                                                                            |                         |                                               |                                                                                                                           |
|------------|----------------|---|-----|----------------------------------------------------------------------------------------------------------------------------|-------------------------|-----------------------------------------------|---------------------------------------------------------------------------------------------------------------------------|
|            |                |   |     | YP_006543.1                                                                                                                | 451/454(99%)            | superfamily                                   |                                                                                                                           |
| <b>116</b> | 98395..98502   | - | 35  | hypothetical protein SEEPO729_20355 [Salmonella enterica subsp. enterica serovar Pomona str. ATCC 10729], 35aa, EHN41286.1 | 1e-10,<br>35/35(100%)   | -                                             | Possibly tellurite or colicin resistance or inhibition of cell division accessory protein                                 |
| <b>117</b> | 98502..98666   | - | 54  | TciB [Enterobacteria phage P1], 54aa, YP_006541.1                                                                          | 1e-16,<br>52/54(96%)    | DUF3927 superfamily                           | Tellurite or colicin resistance or inhibition of cell division accessory protein (by homology)"                           |
| <b>118</b> | 98666..99091   | - | 141 | TciA [Enterobacteria phage P1], 141aa, YP_006540.1                                                                         | 1e-97,<br>141/141(100%) | TerB                                          | Tellurite or colicin resistance or inhibition of cell division (by homology                                               |
| <b>119</b> | 99324..99455   | - | 43  | hypothetical protein PPECC9_43920 [Escherichia coli PCN009], 43aa, OAF89450.1                                              | 7e-23,<br>43/43(100%)   | -                                             | Unknown protein function                                                                                                  |
| <b>120</b> | 99455..99874   | - | 139 | No similar protein                                                                                                         | -                       | -                                             | Unknown protein function                                                                                                  |
| <b>121</b> | 99890..100207  | + | 105 | hypothetical protein [Escherichia coli], 105aa, WP_000711133.1                                                             | 2e-72,<br>104/105(99%)  | -                                             | Unknown protein function                                                                                                  |
| <b>122</b> | 100372..102795 | - | 807 | DMT family permease ,Dmt[Escherichia coli], 807aa, WP_000660975.1                                                          | 0.0,<br>797/807(99%)    | Dcm superfamily;<br>AdoMet_MTases superfamily | Predicted bifunctional DNA methyltransferase; methylates A's in GATC sequences, and (by homology) probably C's at unknown |

a NCBI Database of non-redundant protein sequences was searched using Blastp (protein-protein BLAST)
